# Supplementary material for: Tau mutant A152T, a risk factor for FTD/PSP, induces neuronal dysfunction and reduced lifespan independently of aggregation in a C. elegans Tauopathy model
Source: Springer Nature journal article supplement (doi:10.1186/s13024-016-0096-1), 2016-04-27

# Additional file 9

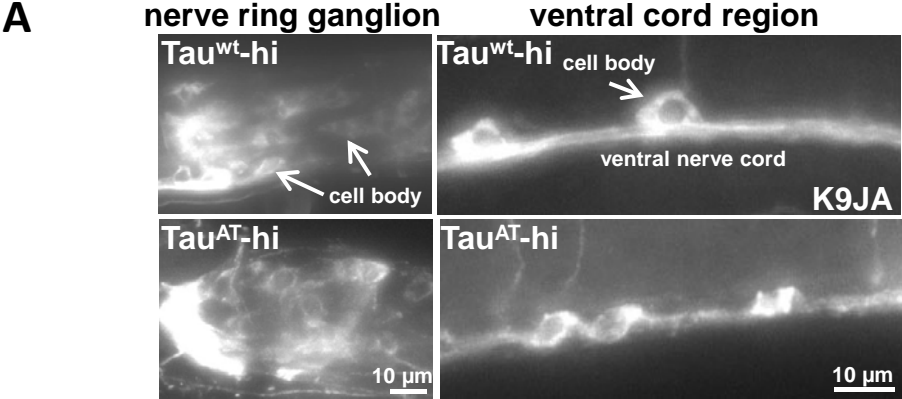

Supplement: MOESM9 [file 13024_2016_96_MOESM9_ESM.pdf]
